# Supplementary material for: Effects of surface water interactions with karst groundwater on microbial biomass, metabolism, and production
Source: Copernicus journal article supplement (doi:10.5194/bg-21-3965-2024), 2024-09-12
Supplement: Supplementary file 1 [file bg-21-3965-2024-supplement.pdf]

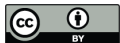

*Supplement of*

## **Effects of surface water interactions with karst groundwater on microbial biomass, metabolism, and production**

**Adrian Barry-Sosa et al.**

*Correspondence to:* Brent C. Christner ([xner@ufl.edu](mailto:xner@ufl.edu))

The copyright of individual parts of the supplement might differ from the article licence.

**SUPPLEMENTARY FIGURES AND TABLES**

| <b>Date</b>  | <b>Samples collected (Location)</b>                   | <b>Hydrological stage (Discharge; gage height, if Applicable)*</b>                                                                                               |
|--------------|-------------------------------------------------------|------------------------------------------------------------------------------------------------------------------------------------------------------------------|
| 6 Dec 2018   | Cell Counts, YSI (GBS-1)                              | 48.1 m <sup>3</sup> s <sup>-1</sup> , 0.3 m (GBS-1)                                                                                                              |
| 8 Apr 2019   | Cell Counts, YSI (LRS)                                | 205.3 m <sup>3</sup> s <sup>-1</sup> , 3.38 m (LRS)                                                                                                              |
| 17 Apr 2019  | Cell Counts, YSI (HS, DE)                             | n.a. (HS, DE)                                                                                                                                                    |
| 14 Jun 2019  | Cell Counts, YSI (DE, MS)                             | n.a. (DE, MS)                                                                                                                                                    |
| 15 Jun 2019  | Cell Counts, YSI (BH)                                 | n.a. (BH)                                                                                                                                                        |
| 28 Jun 2019  | Cell Counts, YSI (PKS)                                | ~15.7 m <sup>3</sup> s <sup>-1</sup> , gage heigh n.d. (PKS)                                                                                                     |
| 14 Aug 2019  | Cell Counts, YSI (GBS-1, GBS-2, RS, RR)               | 40.5 m <sup>3</sup> s <sup>-1</sup> , 0.3 m (GBS-1 and 2)<br>16.1 m <sup>3</sup> s <sup>-1</sup> , 12.1 m (RS); 17.5 m <sup>3</sup> s <sup>-1</sup> , 1.1 m (RR) |
| 27 Feb 2020  | Cell Counts, YSI (LRS)                                | 188 m <sup>3</sup> s <sup>-1</sup> , 2.9 m (LRS)                                                                                                                 |
| 23 Jul 2020  | Cell Counts (MB)                                      | 4.3 m <sup>3</sup> s <sup>-1</sup> , 2.88 m (MB)                                                                                                                 |
| 23 Oct 2020  | YSI, ATP (DE, MS)                                     | n.a. (DE, MS)                                                                                                                                                    |
| 21 Nov 2020  | YSI, ATP (PKS, LRS, MS, HS, DE)                       | n.d. (PKS) 103.9 m <sup>3</sup> s <sup>-1</sup> , 1.9 m (LRS); n.a. (MS, HS, DE)                                                                                 |
| 30 Jan 2021  | Cell Counts, YSI, ATP (RS, RR)                        | 3.2 m <sup>3</sup> s <sup>-1</sup> , 11.2 m (RS); 5.9 m <sup>3</sup> s <sup>-1</sup> , 0.7 m (RR)                                                                |
| 28 Feb 2021  | Cell Counts, YSI, ATP (MB)                            | <u>-1.3 m<sup>3</sup> s<sup>-1</sup>, 8.2 m (MB)</u>                                                                                                             |
| 4 Mar 2021   | YSI, ATP (HS)                                         | n.a. (HS)                                                                                                                                                        |
| 11 Mar 2021  | YSI, ATP (RR)                                         | <u>27 m<sup>3</sup> s<sup>-1</sup>, 1.5 m (RR)</u>                                                                                                               |
| 10 Apr 2021  | Cell Counts, YSI (DE)                                 | n.a. (DE)                                                                                                                                                        |
| 28 Jul 2021  | YSI, Rad, Ox. incubation (DE, HS)                     | n.a. (DE, HS)                                                                                                                                                    |
| 10 Aug 2021  | YSI, ATP (PKS, CS)                                    | n.a. (PKS), n.a. (CS)                                                                                                                                            |
| 25 Aug 2021  | YSI, ATP (BH)                                         | n.a. (BH)                                                                                                                                                        |
| 13 Sept 2021 | YSI, Ox. incubation (DE)                              | n.a. (DE)                                                                                                                                                        |
| 28 Oct 2021  | YSI, ATP (GBS-1, GBS-2, MB, PKS)                      | 44.2 m <sup>3</sup> s <sup>-1</sup> , 0.4 m (GBS-1 and 2)<br>n.d. (PKS)                                                                                          |
| 4 Nov 2021   | YSI (DE, RS, RR); DIC (DE); Cell counts, Rad (RS, RR) | 7.44 m <sup>3</sup> s <sup>-1</sup> , 11.5 m (RS); 15.71 m <sup>3</sup> s <sup>-1</sup> , 1.1 m (RR); n.a. (DE)                                                  |
| 1 Dec 2021   | YSI, Ox. incubation (RS, RR)                          | 7.9 m <sup>3</sup> s <sup>-1</sup> , 11.6 m (RS); 14.9 m <sup>3</sup> s <sup>-1</sup> , 1.1 m (RR)                                                               |
| 26 Jan 2022  | YSI, DIC (RS, RR, HS)                                 | N.A. (HS); 6.6 m <sup>3</sup> s <sup>-1</sup> , 11.5 m (RS); 8.9 m <sup>3</sup> s <sup>-1</sup> , 0.9 (RR)                                                       |
| 7 Mar 2022   | YSI, Rad, Ox. incubation (MB)                         | 4.30 m <sup>3</sup> s <sup>-1</sup> , 2.85 m (MB)                                                                                                                |
| 31 Mar 2022  | YSI, DIC, Ox. incubation (MB)                         | 4.8 m <sup>3</sup> s <sup>-1</sup> , 4.7 m (MB)                                                                                                                  |
| 8 Apr 2022   | YSI, DIC, Ox. incubation (RS)                         | <u>37.9 m<sup>3</sup> s<sup>-1</sup>, 12.9 m (RS)</u>                                                                                                            |
| 21 Apr 2022  | YSI, DIC, POC (DE, HS)                                | N.A. (DE, HS)                                                                                                                                                    |
| 2 Jun 2022   | YSI, DIC, POC (RS, RR)                                | 4.6 m <sup>3</sup> s <sup>-1</sup> , 11.3 m (RS); 11.1 m <sup>3</sup> s <sup>-1</sup> gage height n.d (RR)                                                       |
| 12 Jul 2022  | Cell counts, YSI, Rad, POC (MB)                       | 3.09 m <sup>3</sup> s <sup>-1</sup> , 2.7 m (MB)                                                                                                                 |
| 22 Sep 2022  | YSI, DIC, Rad, POC, Ox. incubation (RS)               | <u>37.66 m<sup>3</sup> s<sup>-1</sup>, 12.8 m (RS)</u>                                                                                                           |
| 27 Sep 2022  | YSI, DIC, Rad, POC, Ox. incubation (RR)               | <u>28 m<sup>3</sup> s<sup>-1</sup>, 1.5 m (RR)</u>                                                                                                               |
| 1 Dec 2022   | Cell Counts, YSI, DIC, Rad, Ox. incubation (MB)       | 3.14 m <sup>3</sup> s <sup>-1</sup> , 2.45 m (MB)                                                                                                                |

**Table S1.** List of sampled dates, indicating the specific samples taken at each location. \*Hydrological data for each location retrieved from the following USGS monitoring stations: GBS-1 and 2 02322500<sup>+</sup>, LRS 02320500<sup>+</sup>, MB 02319302, RR 02321958 and RS 02321898. For PKS, the SRWMD station 02320048 was used. Stations marked with <sup>+</sup> indicates that the monitoring station was not located at the sampling location, so the closest monitoring station at the nearby river was used instead. Underlined locations denote times when the flow was high (RR and RS) or samples

collected during a reversal (MB and PKS). Acronyms: MB: Madison Blue Spring; PKS: Peacock Spring; LRS: Little River Spring; DE: Devil's Eye Spring; HS: Head Spring; BH: Blue Hole Spring; MS: Mission Spring; CS: Coffee Spring. GBS: Gilchrist Blue Springs; RS: Santa Fe River Sink; RR: Santa Fe River Rise. YSI: Measurements using the multiparameter YSI ProDSS probe; DIC: Samples for dissolved inorganic carbon consumption measurements; POC: Samples for measuring particulate organic carbon; Rad: Samples for radioisotopic incubations, Ox. Incubation: samples for oxygen production measurements; ATP: Samples for measuring ATP concentrations. n.d.: no data, n.a.: not applicable.

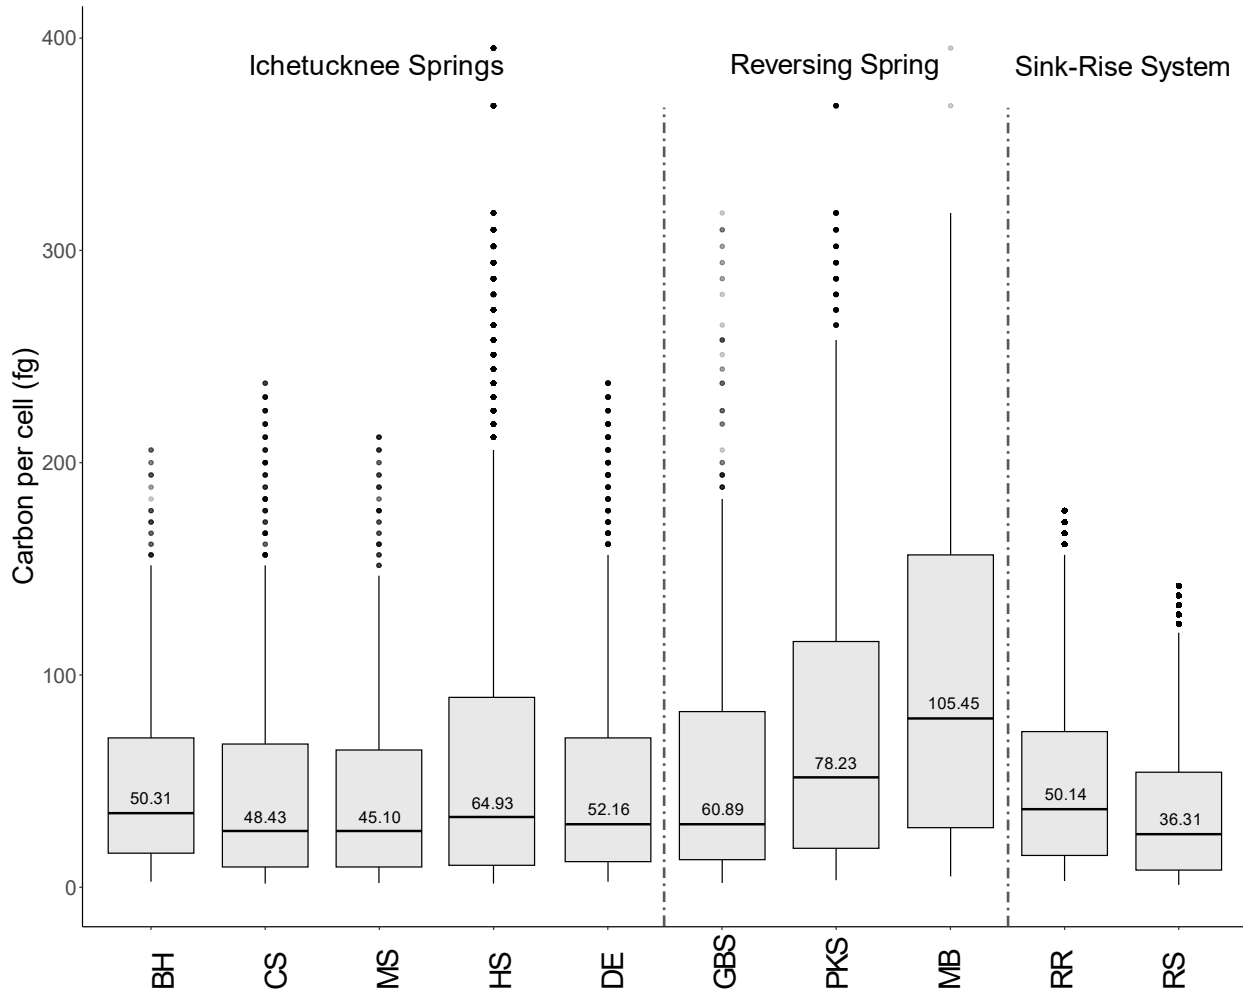

**Figure S1.** Cell Carbon per cell. Numbers within the box plot indicate the average values. Location acronyms are defined at Table S1 caption.

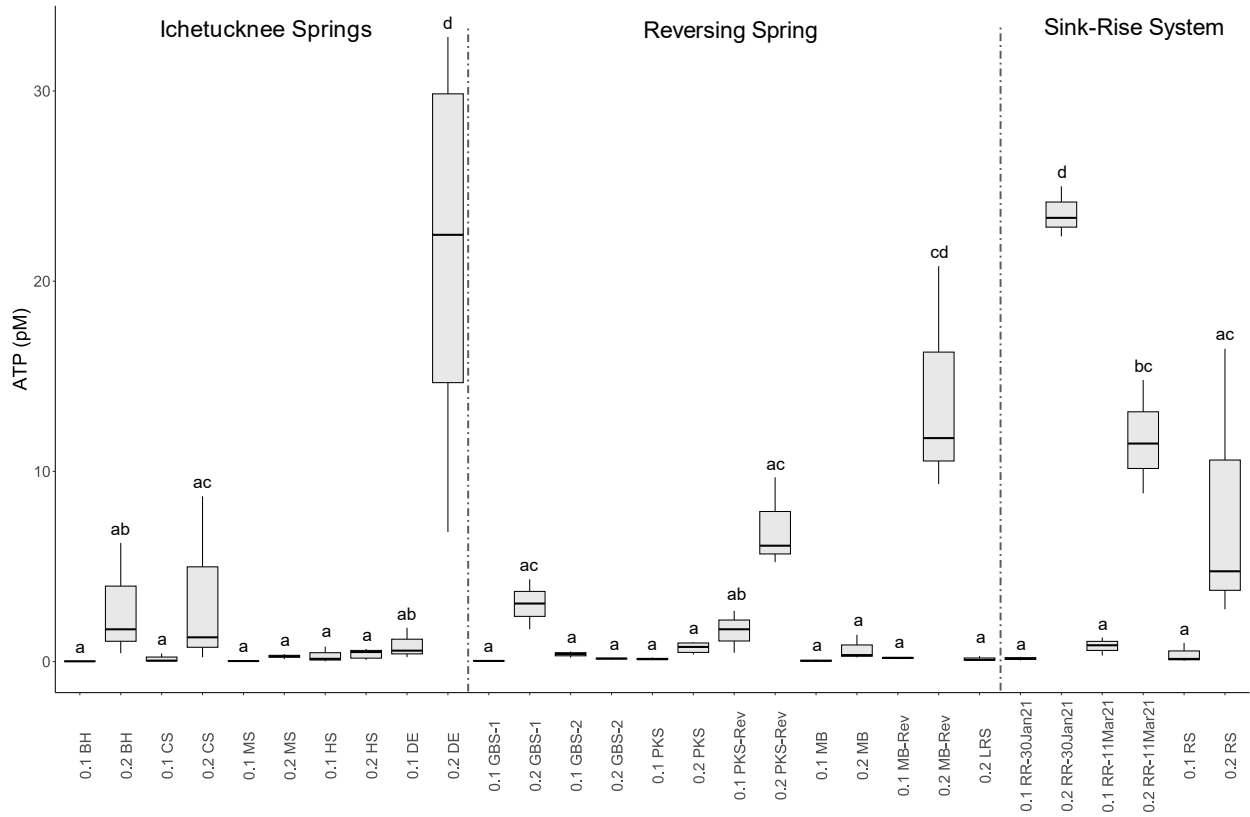

**Figure S2.** Bulk ATP concentration measured at each location in the 0.1 and 0.2  $\mu\text{m}$  fraction. Location acronyms are defined at Table S1 caption. Suffix -Rev indicates a sample collected in a spring during a reversal period.

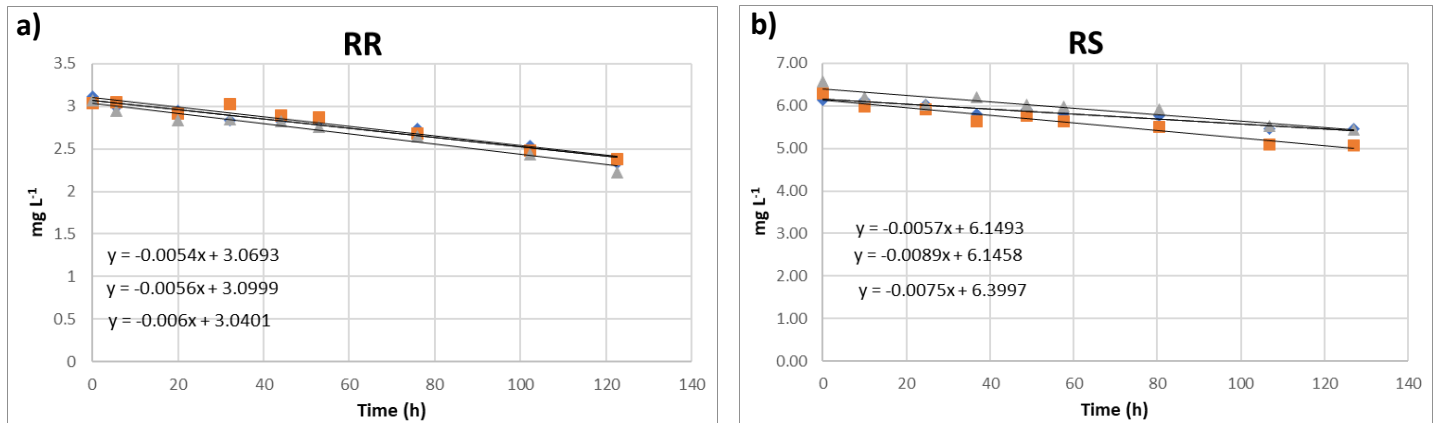

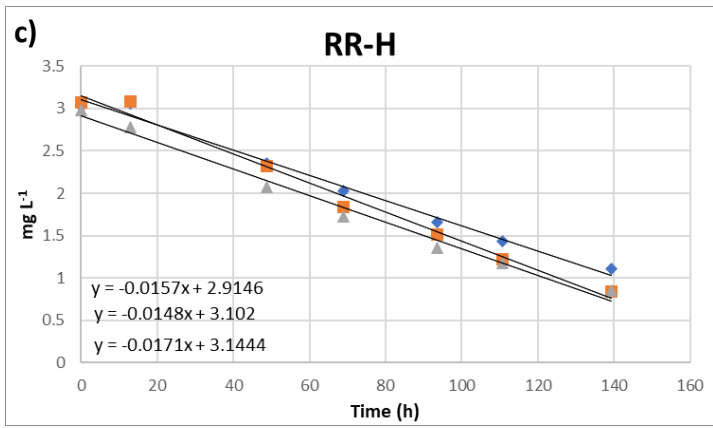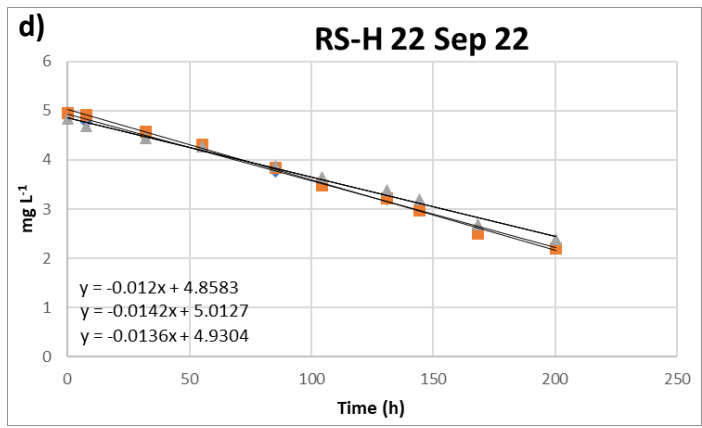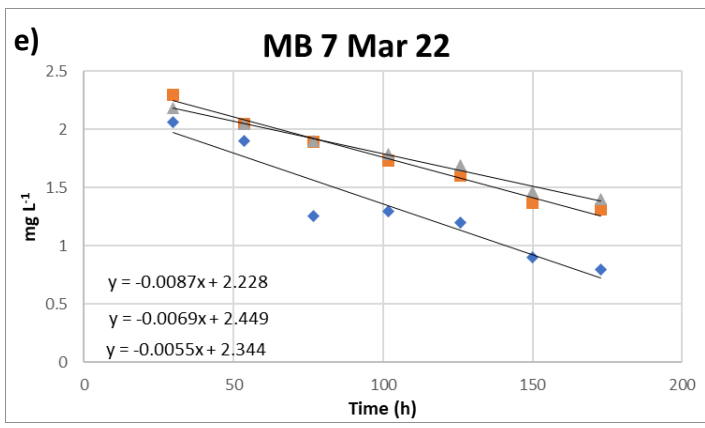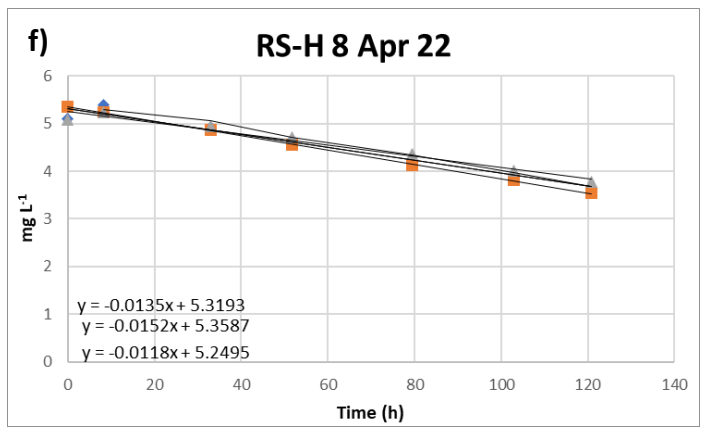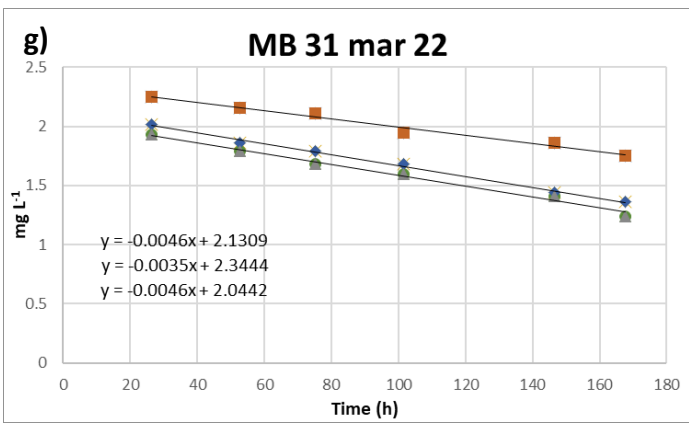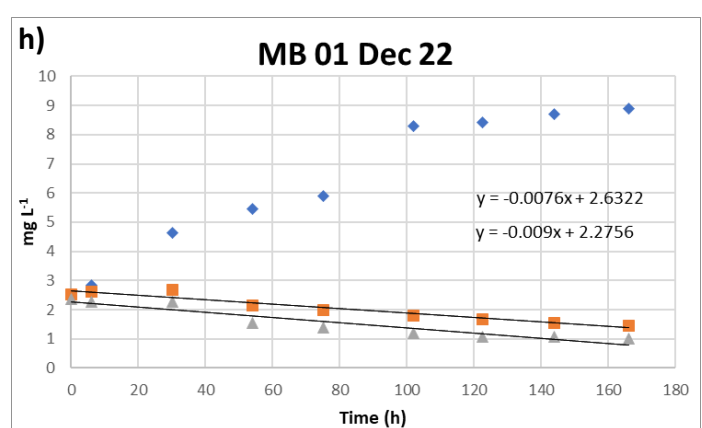

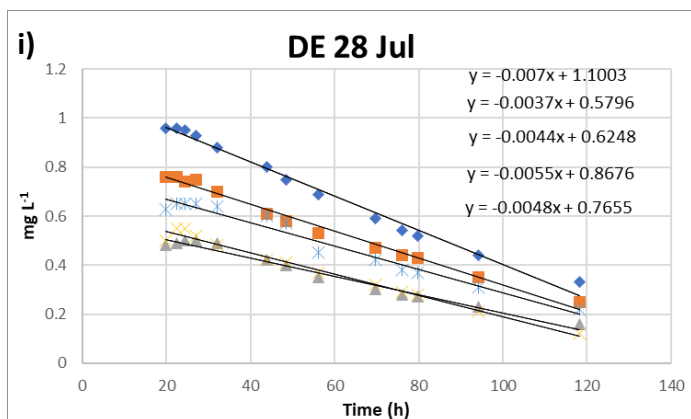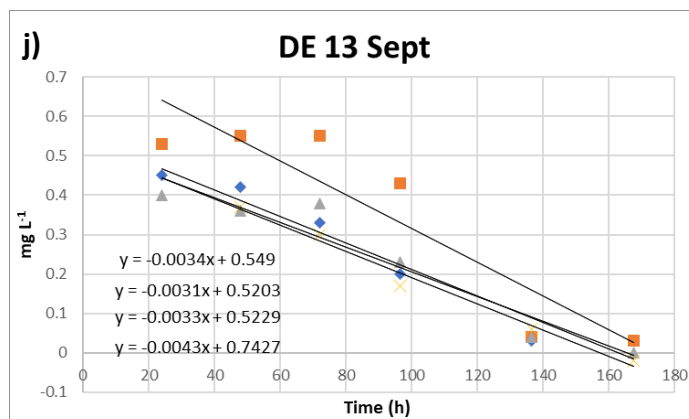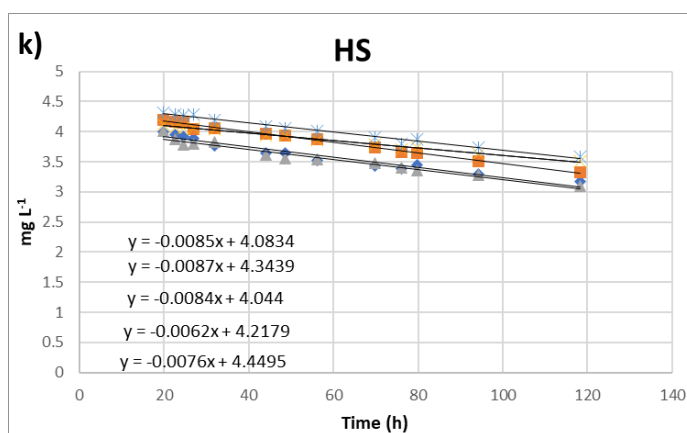

**Figure S3.** Individualized oxygen consumption rates (In mg of oxygen per liter). Location acronyms are defined at Table S1 caption.

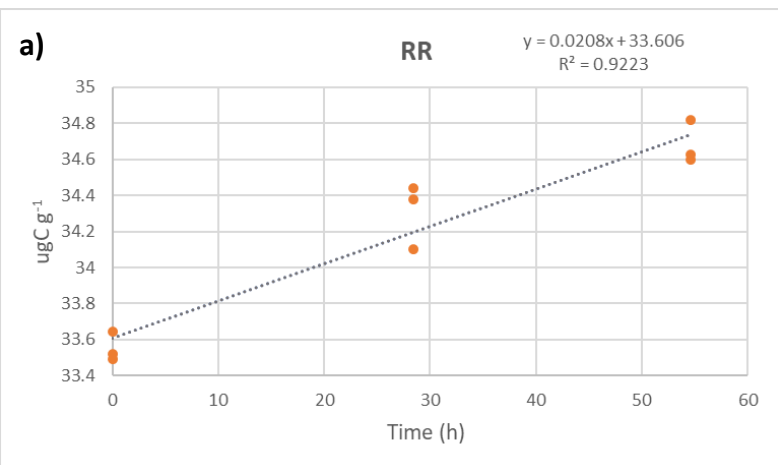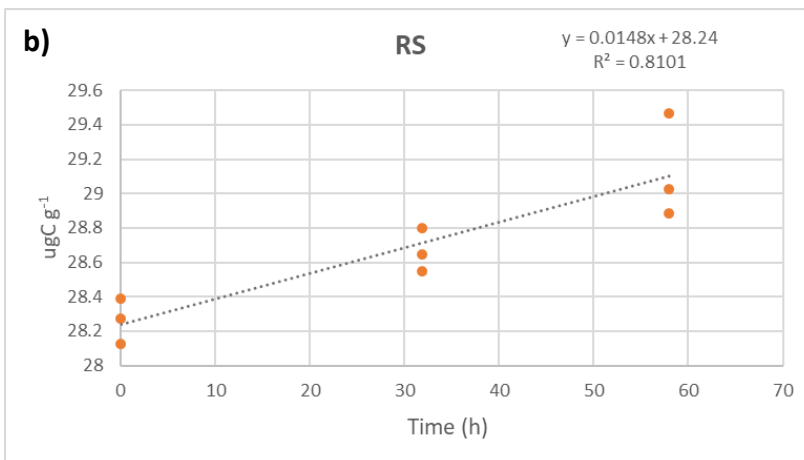

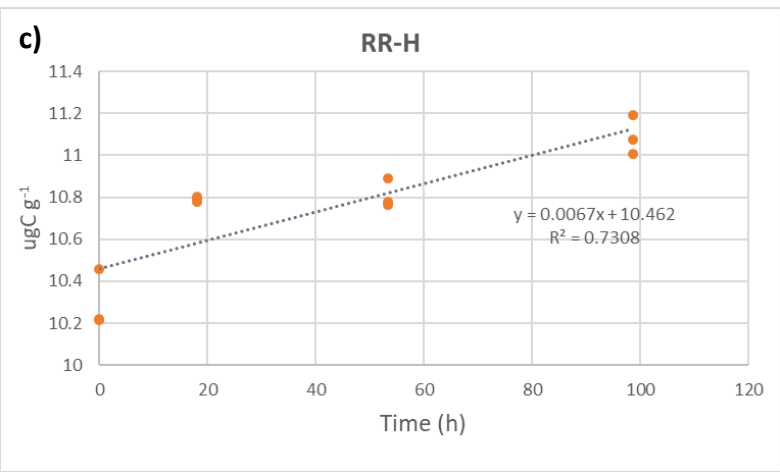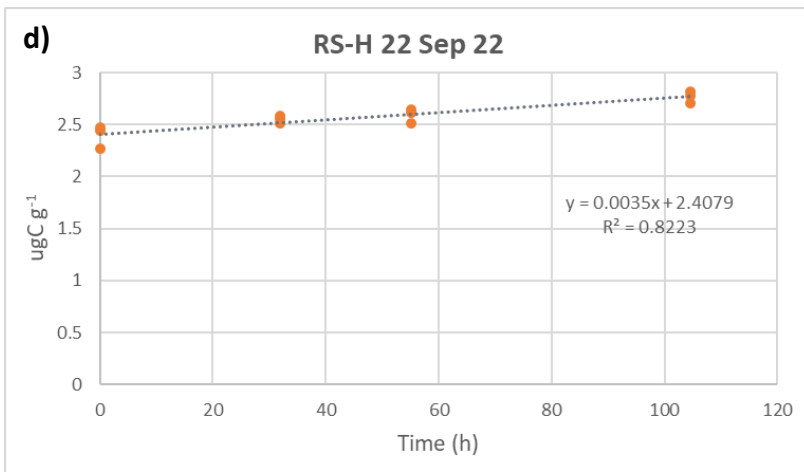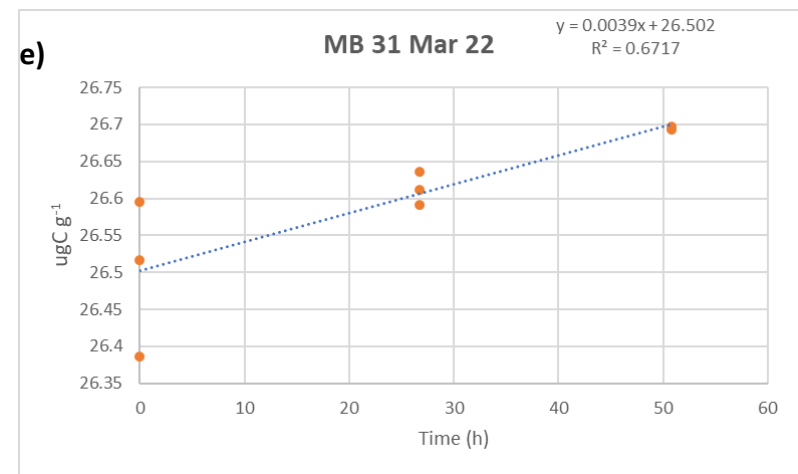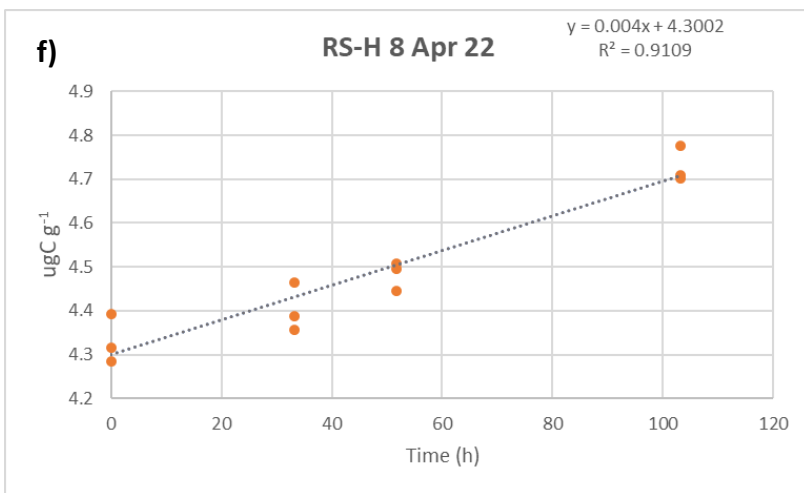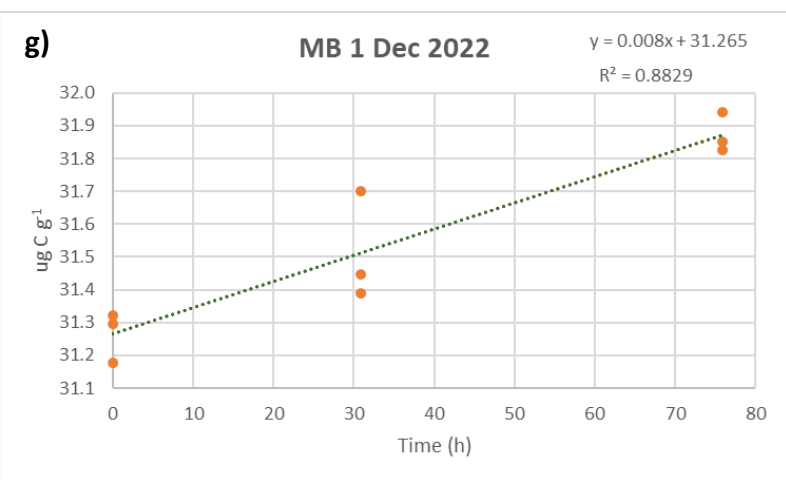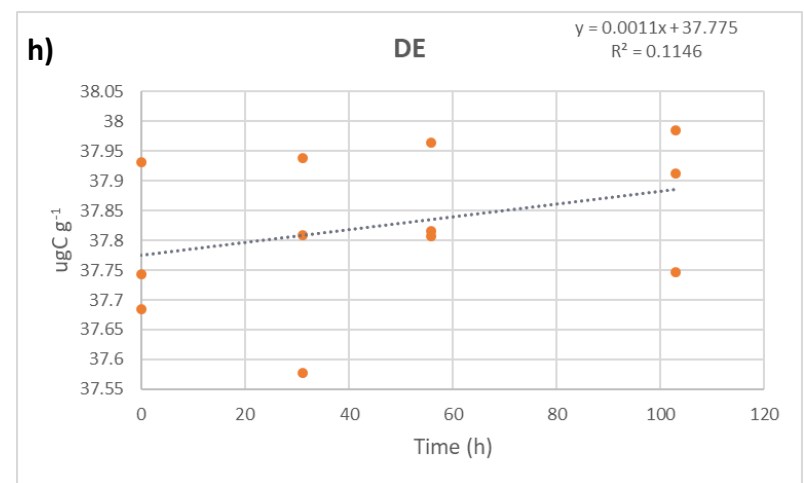

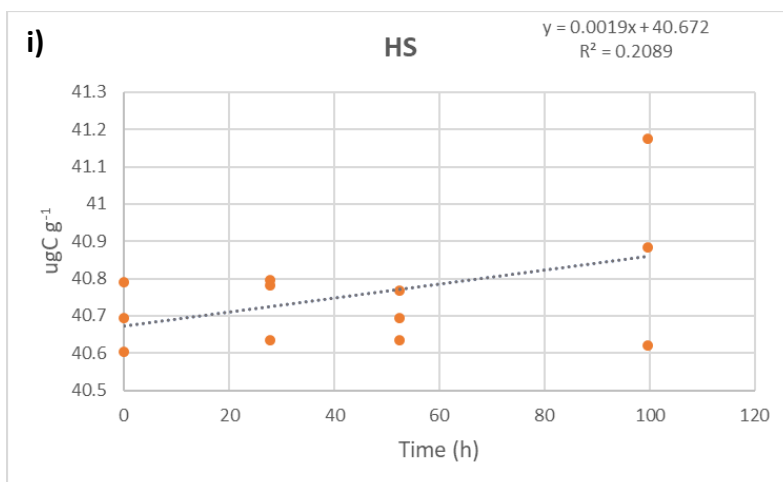

**Figure S4.** Individualized DIC production rates. Location acronyms are defined at Table S1 caption.

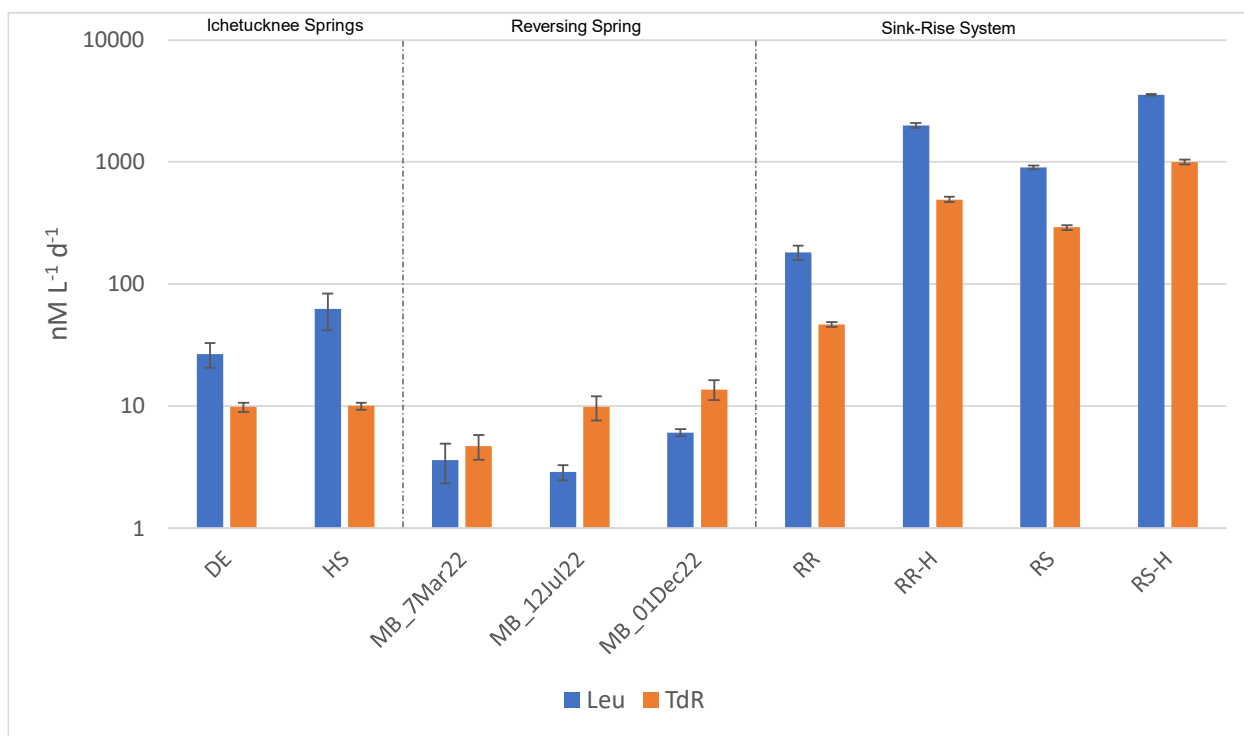

**Figure S5.** Bulk molar incorporation rates of <sup>3</sup>H-leucine and <sup>3</sup>H-thymidine. The -H at sink-rise samples (RR and RS) indicates samples taken during high flow, to differentiate them from the others, taken at low flow. Location acronyms are defined at Table S1 caption.



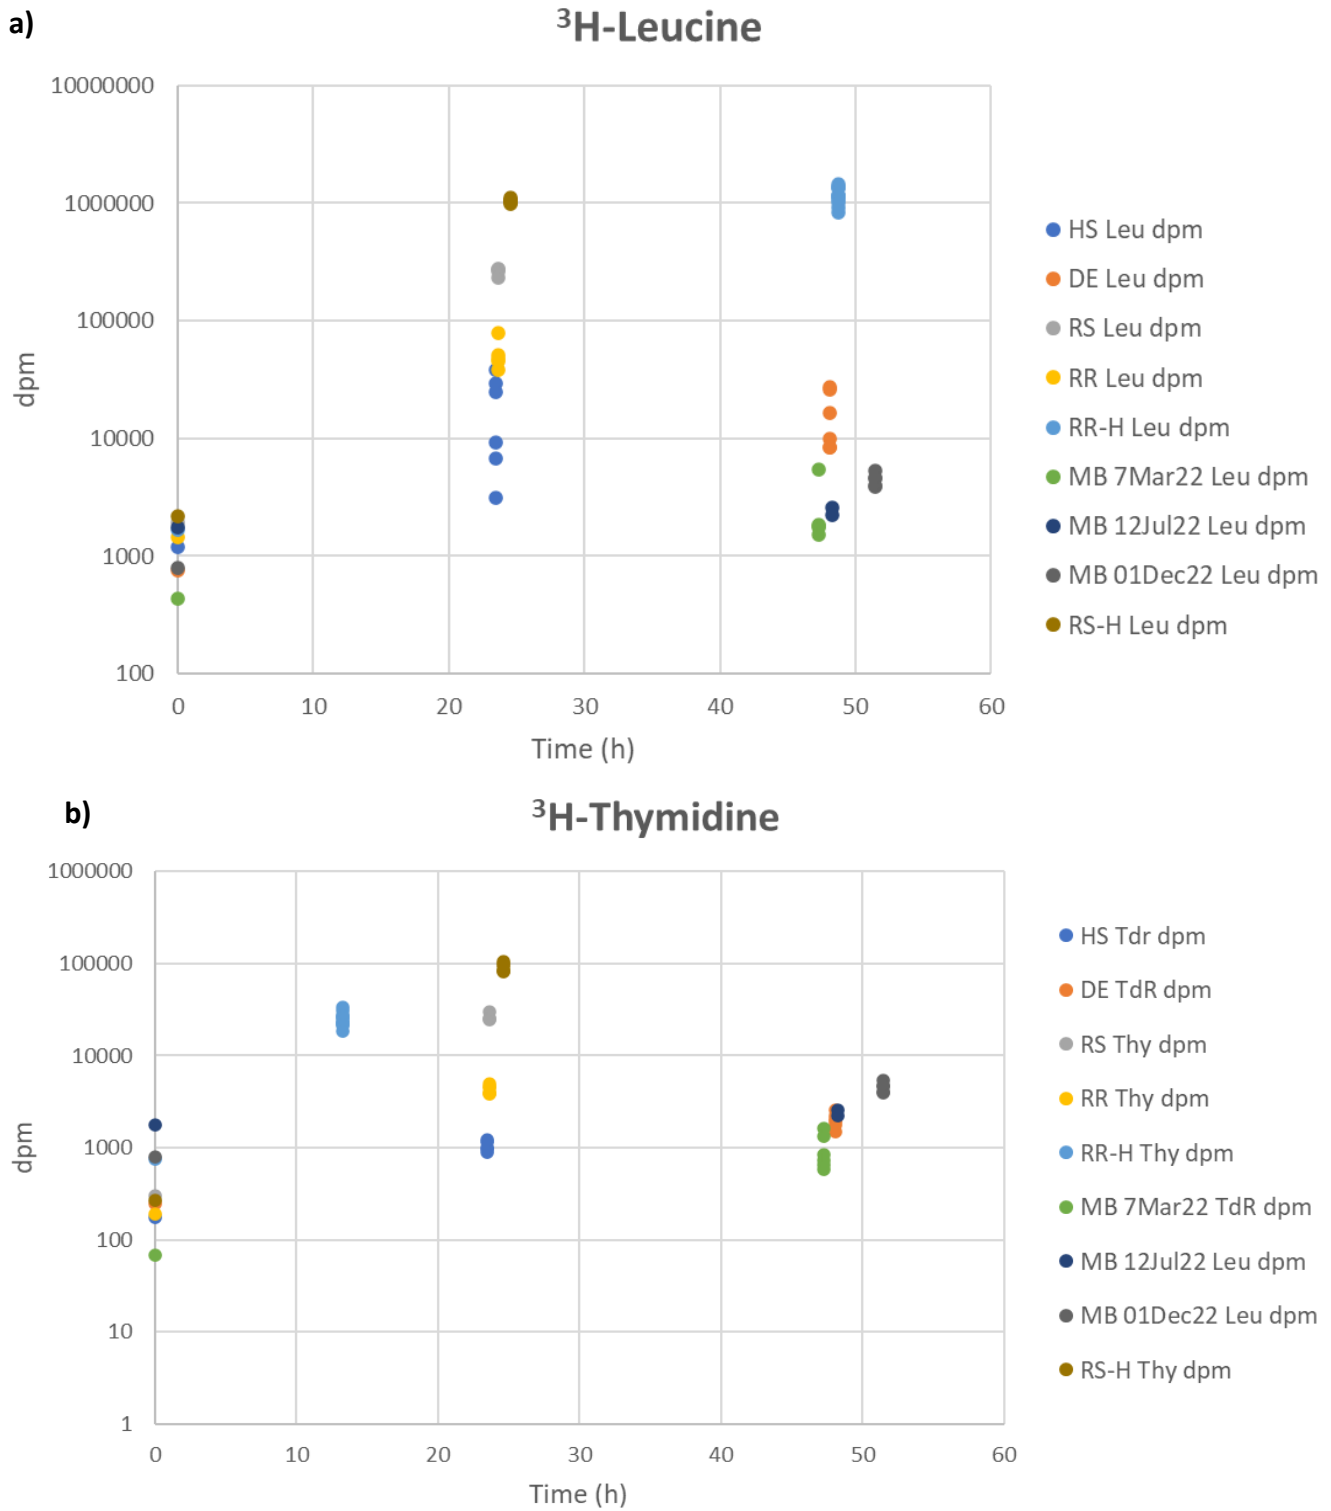

**Figure S6.** Results for radioisotopic incubation in dpm (desintegrations per minute) over time for a) leucine and b) thymidine at each location for each incubation timepoint. Location acronyms are defined at Table S1 caption.

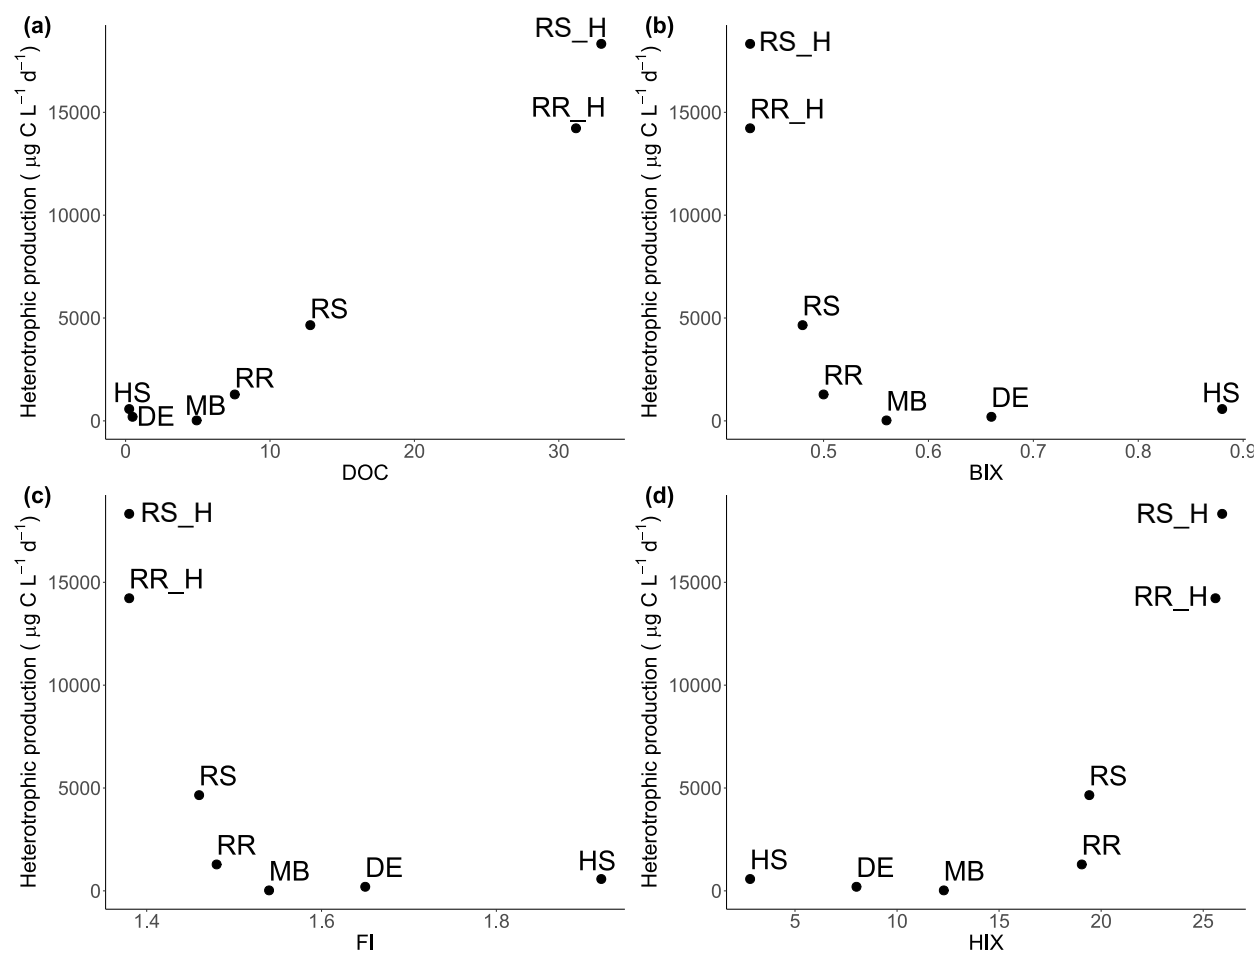

**Figure S7.** Leucine production rates vs. (a) DOC and organic matter quality indices (b) BIX, (c) FI and (d) HIX. Location acronyms are defined at Table S1 caption.

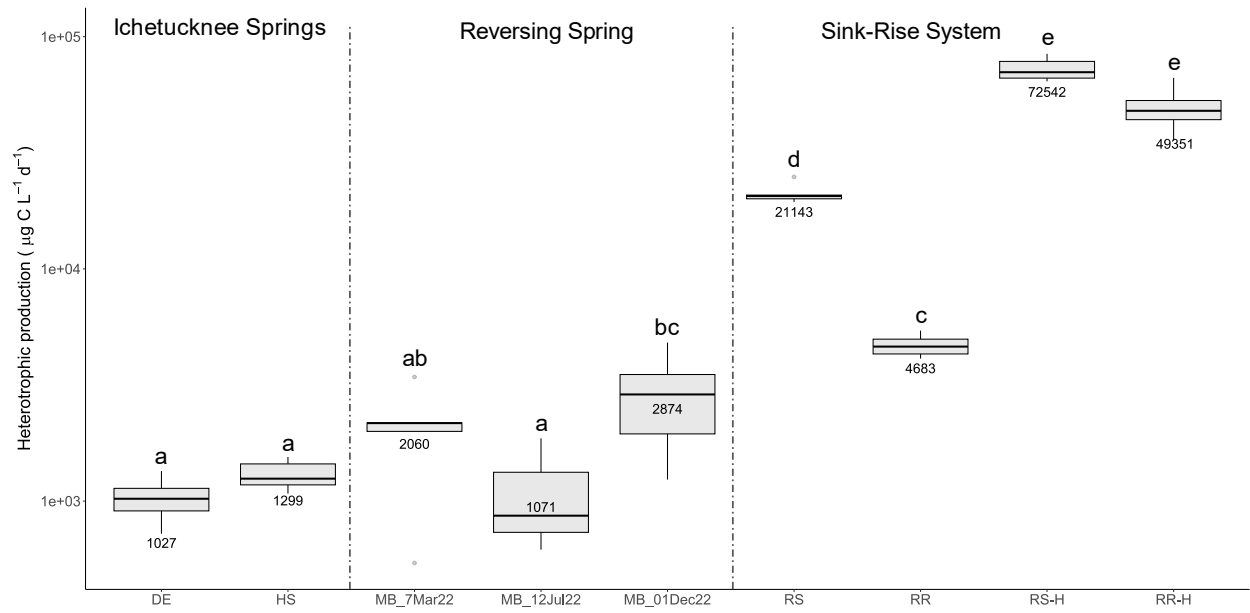

**Figure S8.** Rates of bulk carbon incorporation derived from <sup>3</sup>H-thymidine. Numbers within the box plot indicate the average values. Location acronyms are defined at Table S1 caption.
